# Supplementary material for: Novel Synthetic Coumarin‐Chalcone Derivative (E)‐3‐(3‐(4‐(Dimethylamino)Phenyl)Acryloyl)‐4‐Hydroxy‐2H‐Chromen‐2‐One Activates CREB‐Mediated Neuroprotection in Aβ and Tau Cell Models of Alzheimer’s Disease
Source: Hindawi journal article supplement (doi:10.1155/2021/3058861), 2021-01-01

A

CRE (cAMP response element)

*Mlu* ACGCGTGCAC CAGACAGTGA CGTCAGCTGC CAGATCCCAT GGCCGTCATA CTGTGACGTC TTTCAGACAC  
 CCCATTGACG TCAATGGGAG AACAGATCTG CCGCCCCGAC TGCATCTGCG TGTTCGAATT CGCCAATGAC  
 AAGACGCTGG GCGGGGTTTG TGTCATCATA GAACTAAAGA CATGCAAATA TATTTCTTCC GGGGACACCG  
 CCAGCAAACG CGAGCAACGG GCCACGGGGA TGAAGCAGAC CGGT

 $P_{TAL}$  (TATA-like promoter)*Age*I

B

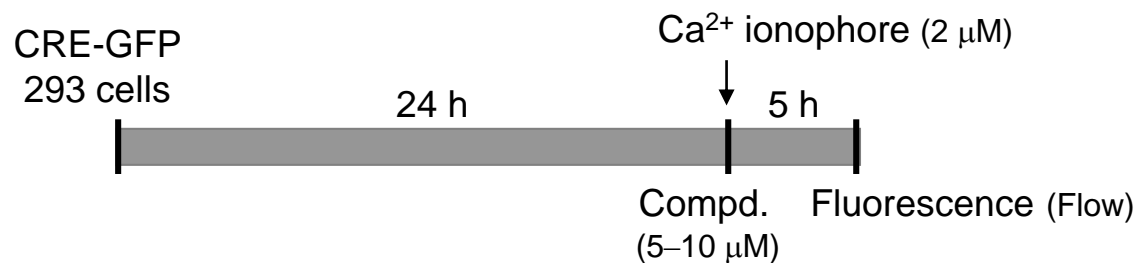

Supplement: f1 [file 3058861.f1.zip]
