# Supplementary material for: Novel Synthetic Coumarin‐Chalcone Derivative (E)‐3‐(3‐(4‐(Dimethylamino)Phenyl)Acryloyl)‐4‐Hydroxy‐2H‐Chromen‐2‐One Activates CREB‐Mediated Neuroprotection in Aβ and Tau Cell Models of Alzheimer’s Disease
Source: Hindawi journal article supplement (doi:10.1155/2021/3058861), 2021-01-01
Supplement: f1 [file 3058861.f1.zip]

## Supplementary Description

*Preparation and analysis of mouse plasma and brain homogenate samples.* A solvent-based protein precipitation procedure was used for analyzing plasma and brain homogenate samples. A 20- $\mu$ l aliquot of each plasma sample was mixed with 60  $\mu$ l of acetonitrile. For brain samples, collected brains were homogenized in 3 volumes of methanol, and then 50  $\mu$ l of brain homogenate was mixed with 50  $\mu$ l of acetonitrile. After vortexing and centrifugation ( $20,000 \times g$  for 5 min), the extracted supernatants were collected. Liquid chromatography – tandem mass spectrometry (LC-MS/MS) analyses was performed using an Agilent 1200 (Agilent Technologies, Palo Alto, CA, USA) coupled to a QTrap 5500 triple-quadrupole mass spectrometer (AB SCIEX, Foster City, CA, USA). Chromatographic separation was performed on an Eclipse Plus C18 column (3.5  $\mu$ m;  $4.6 \times 50$  mm; Agilent Technologies) with the mobile phase performed at a constant flow rate of 1.0 ml/min using a binary solvent system: solvent A, 5 mM ammonium acetate; solvent B, acetonitrile. The transition (precursor ion to daughter ion) monitored was  $m/z$  336.2  $\rightarrow$  321.0 for LM-021. Multiple reaction monitoring (MRM) data were acquired, and the chromatograms were integrated using Analyst 1.6.3 software (Applied Biosystems). A weighted (1/x) linear regression was used to generate the calibration curves from standards and to calculate the sample concentrations. The calibration curve was linear over the concentration range of 1 to 200 ng/ml.

**Figure S1:** Oral bioavailability prediction and TEM examination of A $\beta$  and Tau aggregates. (A) Molecular weight (MW), hydrogen bond donor (HBD), hydrogen bond acceptor (HBA), calculated octanol-water partition coefficient (cLogP), polar surface area (PSA), and predicted blood-brain barrier (BBB) score of these compounds. (B) Transmission electron microscope (TEM) examination of A $\beta_{42}$ /A $\Delta$ K280 tau<sub>RD</sub> aggregation without or with curcumin/congo red and LM-021 (10  $\mu$ M) addition.

**Figure S2:** Nucleotide sequence of synthetic CRE fused to TATA-like promoter and CRE fluorescence reporter assay. (A) Nucleotide sequence of synthetic fragment containing two copies of the CRE (cAMP response element) (blue box) fused to  $P_{TAL}$  (TATA-like promoter) region from the HSV-TK (herpes simplex virus thymidine kinase) gene (pink) flanked by *Mlu*I (ACGCGT) and *Age*I (ACCGGT) restriction sites (red). (B) Experimental flow chart for GFP fluorescence analysis of CRE reporter cells. CRE-GFP 293 cells were treated with tested compounds (5–10  $\mu$ M) and  $Ca^{2+}$  ionophore (2  $\mu$ M) for 5 h and GFP fluorescence assessed by flow cytometry.

**Figure S3:** Dose response curves based on GFP fluorescence and ROS images in A $\beta$ -GFP cells. (A) Dose response curves of test compounds based on GFP fluorescence measurement. (B) Images of CellROX assay of A $\beta$ -GFP cells uninduced, induced, or treated with test compounds at 5  $\mu$ M. (C) Representative images of TUBB3 signal (yellow) in differentiated A $\beta$ -GFP SH-SY5Y cells uninduced, induced or treated with test compounds (5  $\mu$ M). Nuclei were counterstained with DAPI (blue). Also shown were segmented images with multi-coloured mask to outline outgrowth of individual cell body for neurite outgrowth quantification.

**Figure S4:** Dose response curves based on DsRed fluorescence and ROS images in  $\Delta$ K280 tau<sub>RD</sub>-DsRed cells. (A) Dose response curves of test compounds based on DsRed fluorescence measurement. (B) Images of DCF assay of  $\Delta$ K280 tau<sub>RD</sub>-DsRed cells uninduced, induced, or treated with test compounds at 10  $\mu$ M. (C) Representative images of TUBB3 signal (green) in differentiated  $\Delta$ K280 tau<sub>RD</sub>-DsRed SH-SY5Y cells uninduced, induced, or treated with test compounds (10  $\mu$ M). Nuclei were counterstained with DAPI (blue). Also shown were segmented images with multi-coloured mask to outline outgrowth of individual cell body for neurite outgrowth quantification.

**Figure S5:** Experimental flow chart to examine LM-021-mediated kinase activation. On day 2, CRE-GFP 293 cells were treated with kinase inhibitors (10  $\mu$ M) for 4 h, followed by Ca<sup>2+</sup> ionophore (2  $\mu$ M) and compound addition (10  $\mu$ M) for 5 h. GFP fluorescence and p-CREB and GFP levels were assessed.

**Figure S6:** Regulation of CREB signaling pathway and neurite outgrowth images in A $\beta$ -GFP cells. (A) p-CREB, BDNF, BCL, and BAX protein levels analyzed by immunoblot using GAPDH as a loading control ( $n = 3$ ). To normalize, protein expression level in untreated cells was set at 100%.  $p$  values: comparisons between induced vs. uninduced cells (#:  $p < 0.05$ , ##:  $p < 0.01$ , ###:  $p < 0.001$ ), LM-021-treated vs. untreated cells (\*\*:  $p < 0.01$ , \*\*\*:  $p < 0.001$ ), or kinase inhibitor-treated vs. untreated cells (&:  $p < 0.05$ , &&:  $p < 0.01$ , &&&:  $p < 0.001$ ). (one-way ANOVA with a *post hoc* Tukey test) (B) Representative images of TUBB3 signal (yellow) and segmented images with multi-coloured mask to outline outgrowth of individual cell body. Nuclei were counterstained with DAPI (blue).

**Figure S7:** Regulation of CREB signaling pathway and neurite outgrowth images in  $\Delta$ K280 tau<sub>RD</sub>-DsRed cells. (A) p-CREB, BDNF, BCL, and BAX protein levels

analyzed by immunoblot using GAPDH as a loading control ( $n = 3$ ). To normalize, protein expression level in untreated cells was set at 100%.  $p$  values: comparisons between induced vs. uninduced cells ( $\#$ :  $p < 0.05$ ,  $\###$ :  $p < 0.001$ ), LM-021-treated vs. untreated cells ( $*$ :  $p < 0.05$ ), or kinase inhibitor-treated vs. untreated cells ( $\&$ :  $p < 0.05$ ,  $\&\&$ :  $p < 0.01$ ). (one-way ANOVA with a *post hoc* Tukey test) (B) Representative images of TUBB3 signal (green) and segmented images with multi-coloured mask to outline outgrowth of individual cell body. Nuclei were counterstained with DAPI (blue).
