# Supplementary material for: Novel Synthetic Coumarin-Chalcone Derivative (E)-3-(3-(4-(Dimethylamino)Phenyl)Acryloyl)-4-Hydroxy-2H-Chromen-2-One Activates CREB-Mediated Neuroprotection in Aβ and Tau Cell Models of Alzheimer's Disease
Source: Oxid Med Cell Longev. 2021 Nov 13;2021:3058861. doi: 10.1155/2021/3058861 (PMC8605905; doi:10.1155/2021/3058861)
Supplement: Supplementary Materials — Preparation and analysis of mouse plasma and brain homogenate samples. Figure S1: oral bioavailability prediction and TEM examination of Aβ and tau aggregates. Figure S2: nucleotide sequence of synthetic CRE fused to TATA-like promoter and CRE fluorescence reporter assay. Figure S3: dose-response curves based on GFP fluorescence and ROS images in Aβ-GFP cells. Figure S4: dose-response curves based on DsRed fluorescence and ROS images in ΔK280 tauRD-DsRed cells. Figure S5: experimental flow chart to examine LM-021-mediated kinase activation. Figure S6: regulation of CREB signaling pathway and neurite outgrowth images in Aβ-GFP cells. Figure S7: regulation of CREB signaling pathway and neurite outgrowth images in ΔK280 tauRD-DsRed cells. [file 3058861.f1.zip]

Archive with 8 entries (8 files):
- 3058861.f1/4_14 Supplementary Materials.pdf
- 3058861.f1/Fig-S1.pdf
- 3058861.f1/Fig-S2.pdf
- 3058861.f1/Fig-S3.pdf
- 3058861.f1/Fig-S4.pdf
- 3058861.f1/Fig-S5.pdf
- 3058861.f1/Fig-S6.pdf
- 3058861.f1/Fig-S7.pdf
