# Supplementary figures and images for: Novel Synthetic Coumarin‐Chalcone Derivative (E)‐3‐(3‐(4‐(Dimethylamino)Phenyl)Acryloyl)‐4‐Hydroxy‐2H‐Chromen‐2‐One Activates CREB‐Mediated Neuroprotection in Aβ and Tau Cell Models of Alzheimer’s Disease
Source: Hindawi journal article supplement (doi:10.1155/2021/3058861), 2021-01-01

A

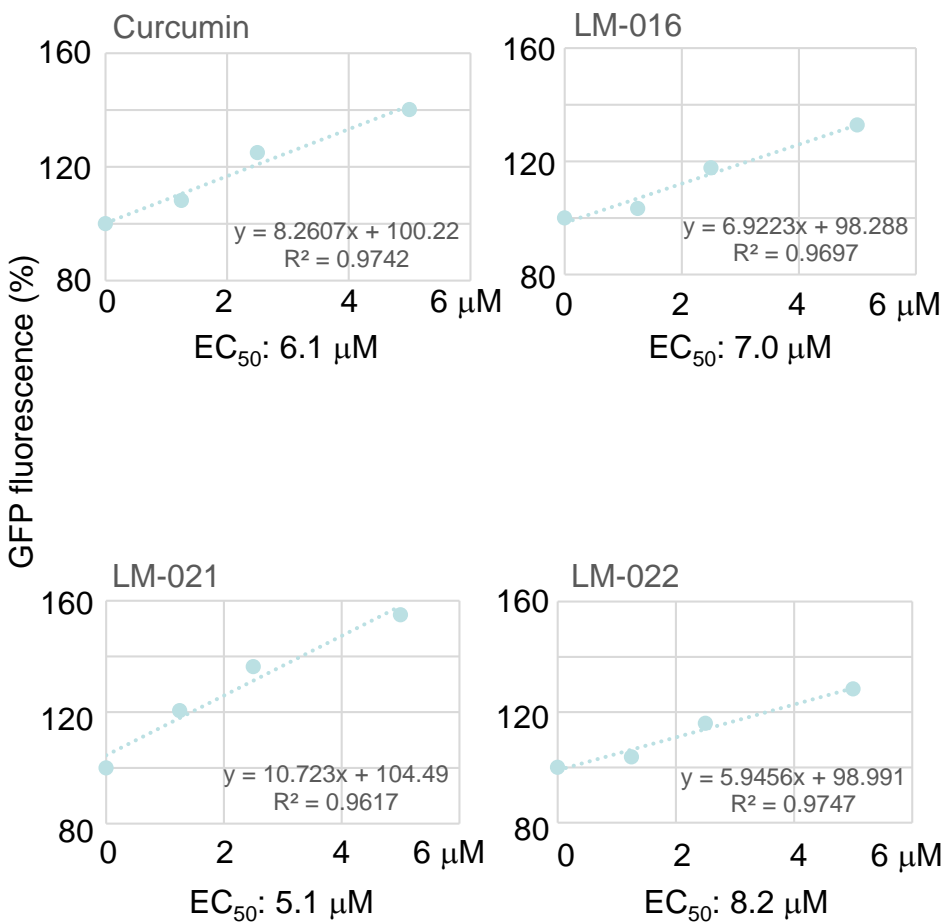

B CellROX/Phase

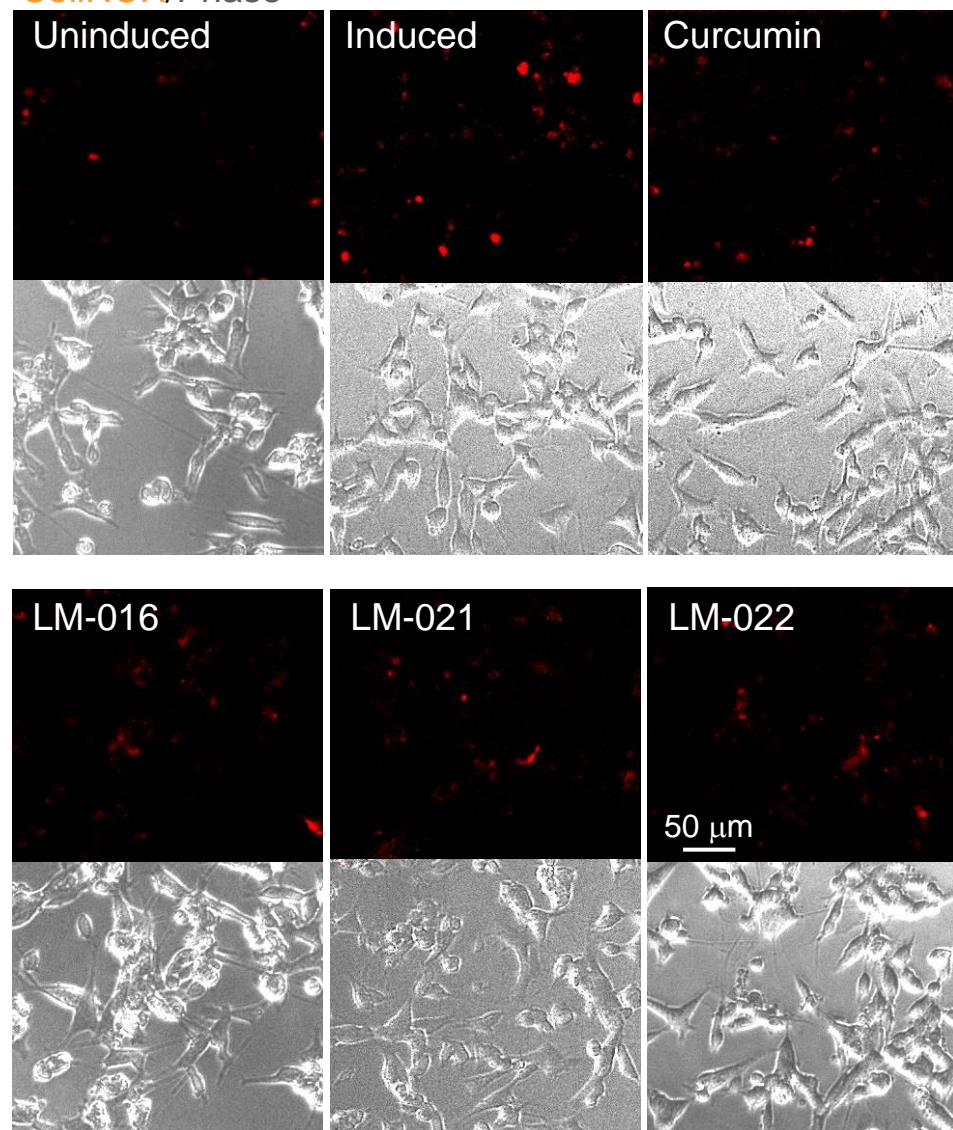

C

TUBB3/DAPI

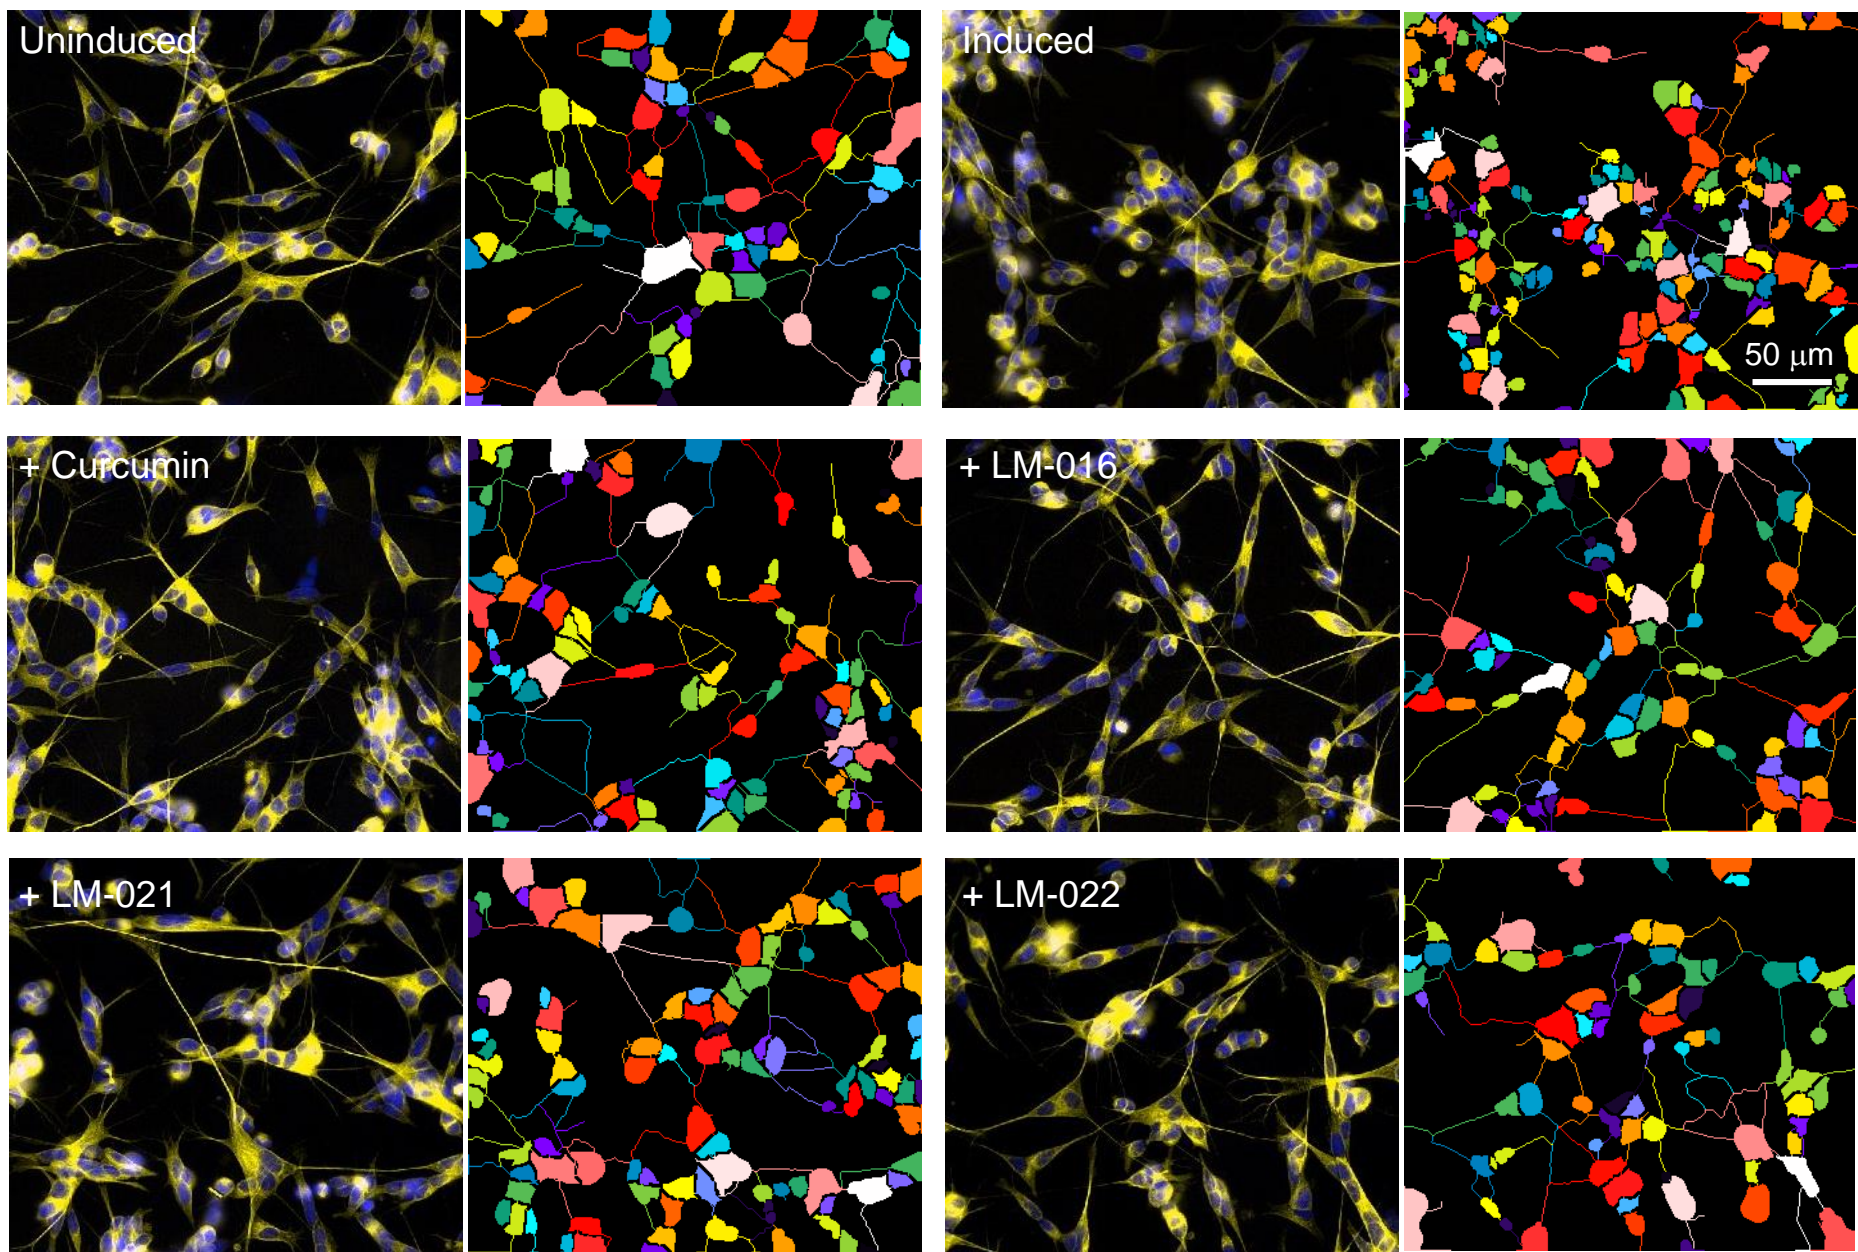

Supplement: f1 [file 3058861.f1.zip]

**A**

| Compound | MW     | HBD | HBA | cLogP | PSA  | BBB score<br>(Threshold: 0.02) |
|----------|--------|-----|-----|-------|------|--------------------------------|
| LM-016   | 306.31 | 1   | 4   | 4.45  | 63.6 | 0.145                          |
| LM-021   | 335.35 | 1   | 5   | 4.11  | 66.8 | 0.098                          |
| LM-022   | 282.25 | 1   | 5   | 3.12  | 72.8 | 0.153                          |

**B**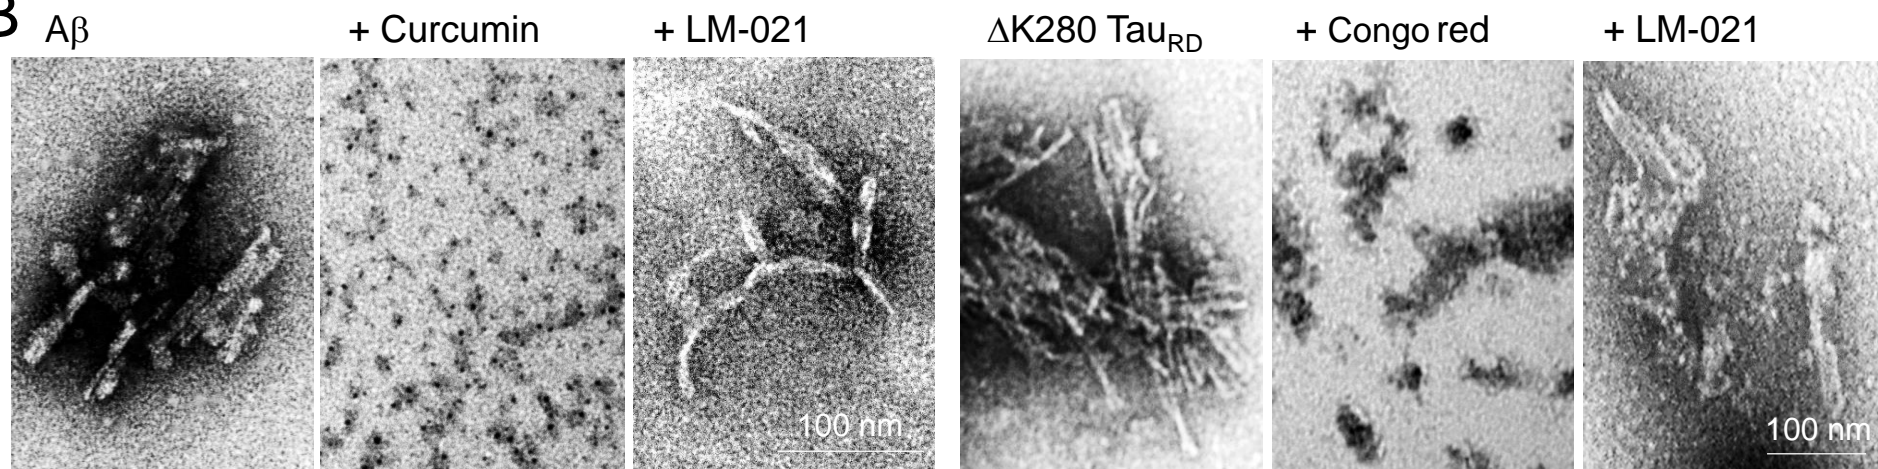

Supplement: f1 [file 3058861.f1.zip]

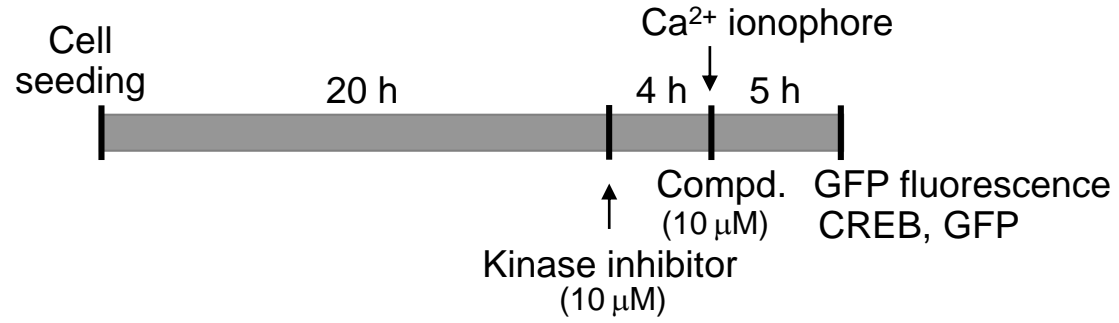

Supplement: f1 [file 3058861.f1.zip]

A

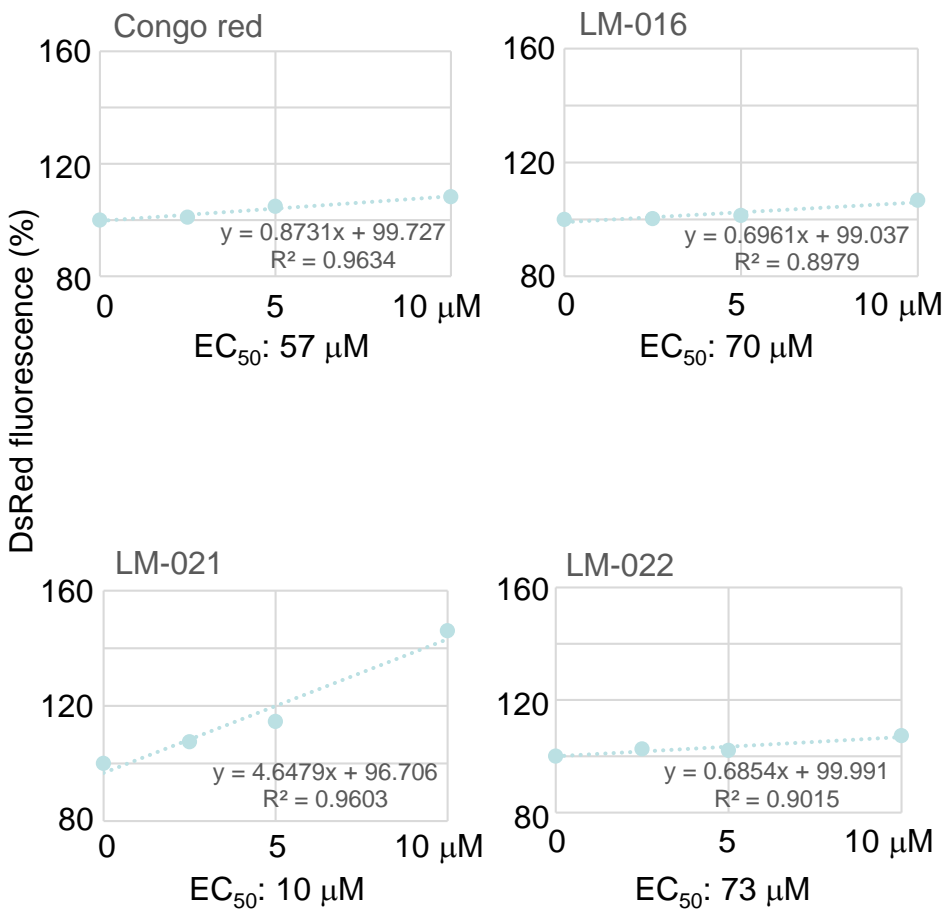

B

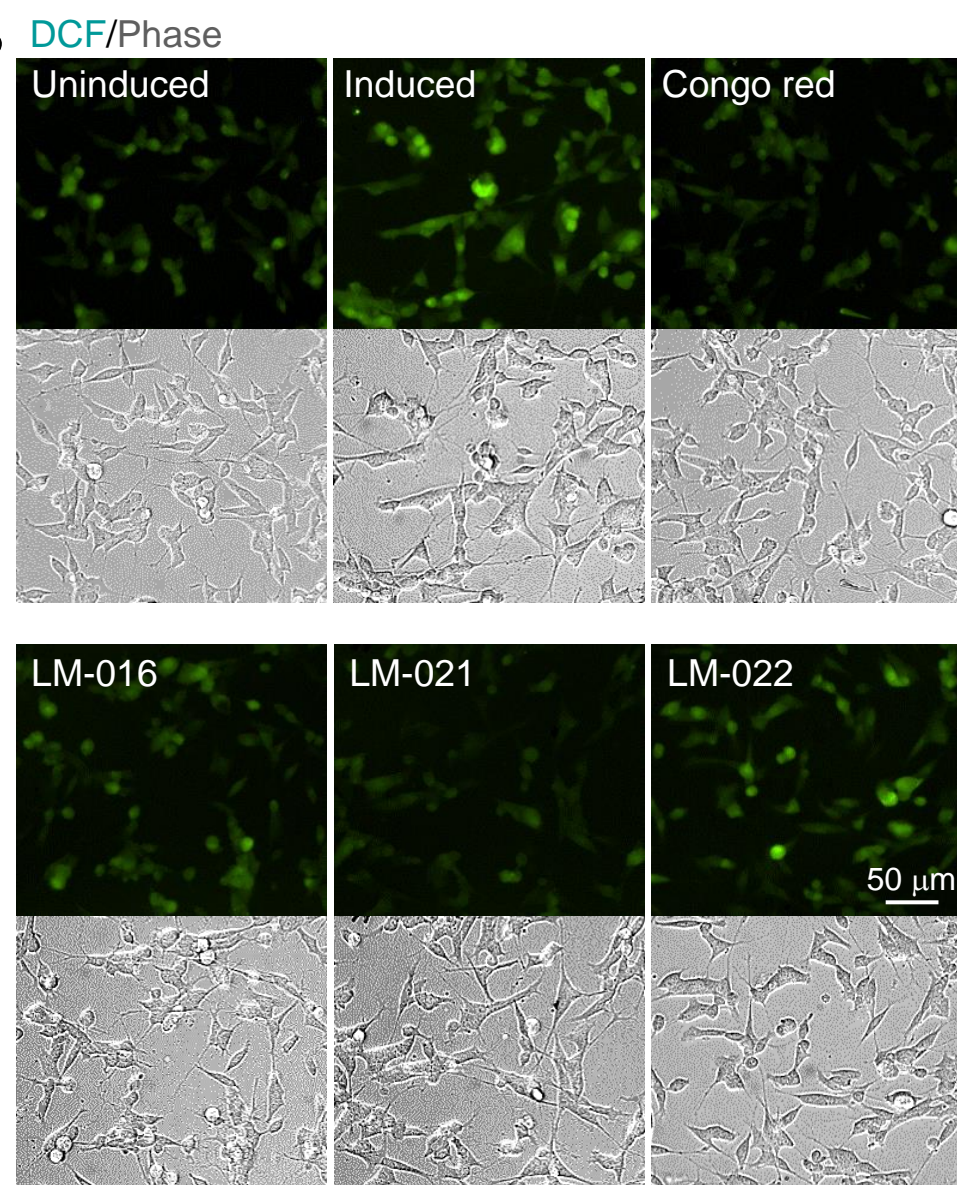

C

TUBB3/DAPI

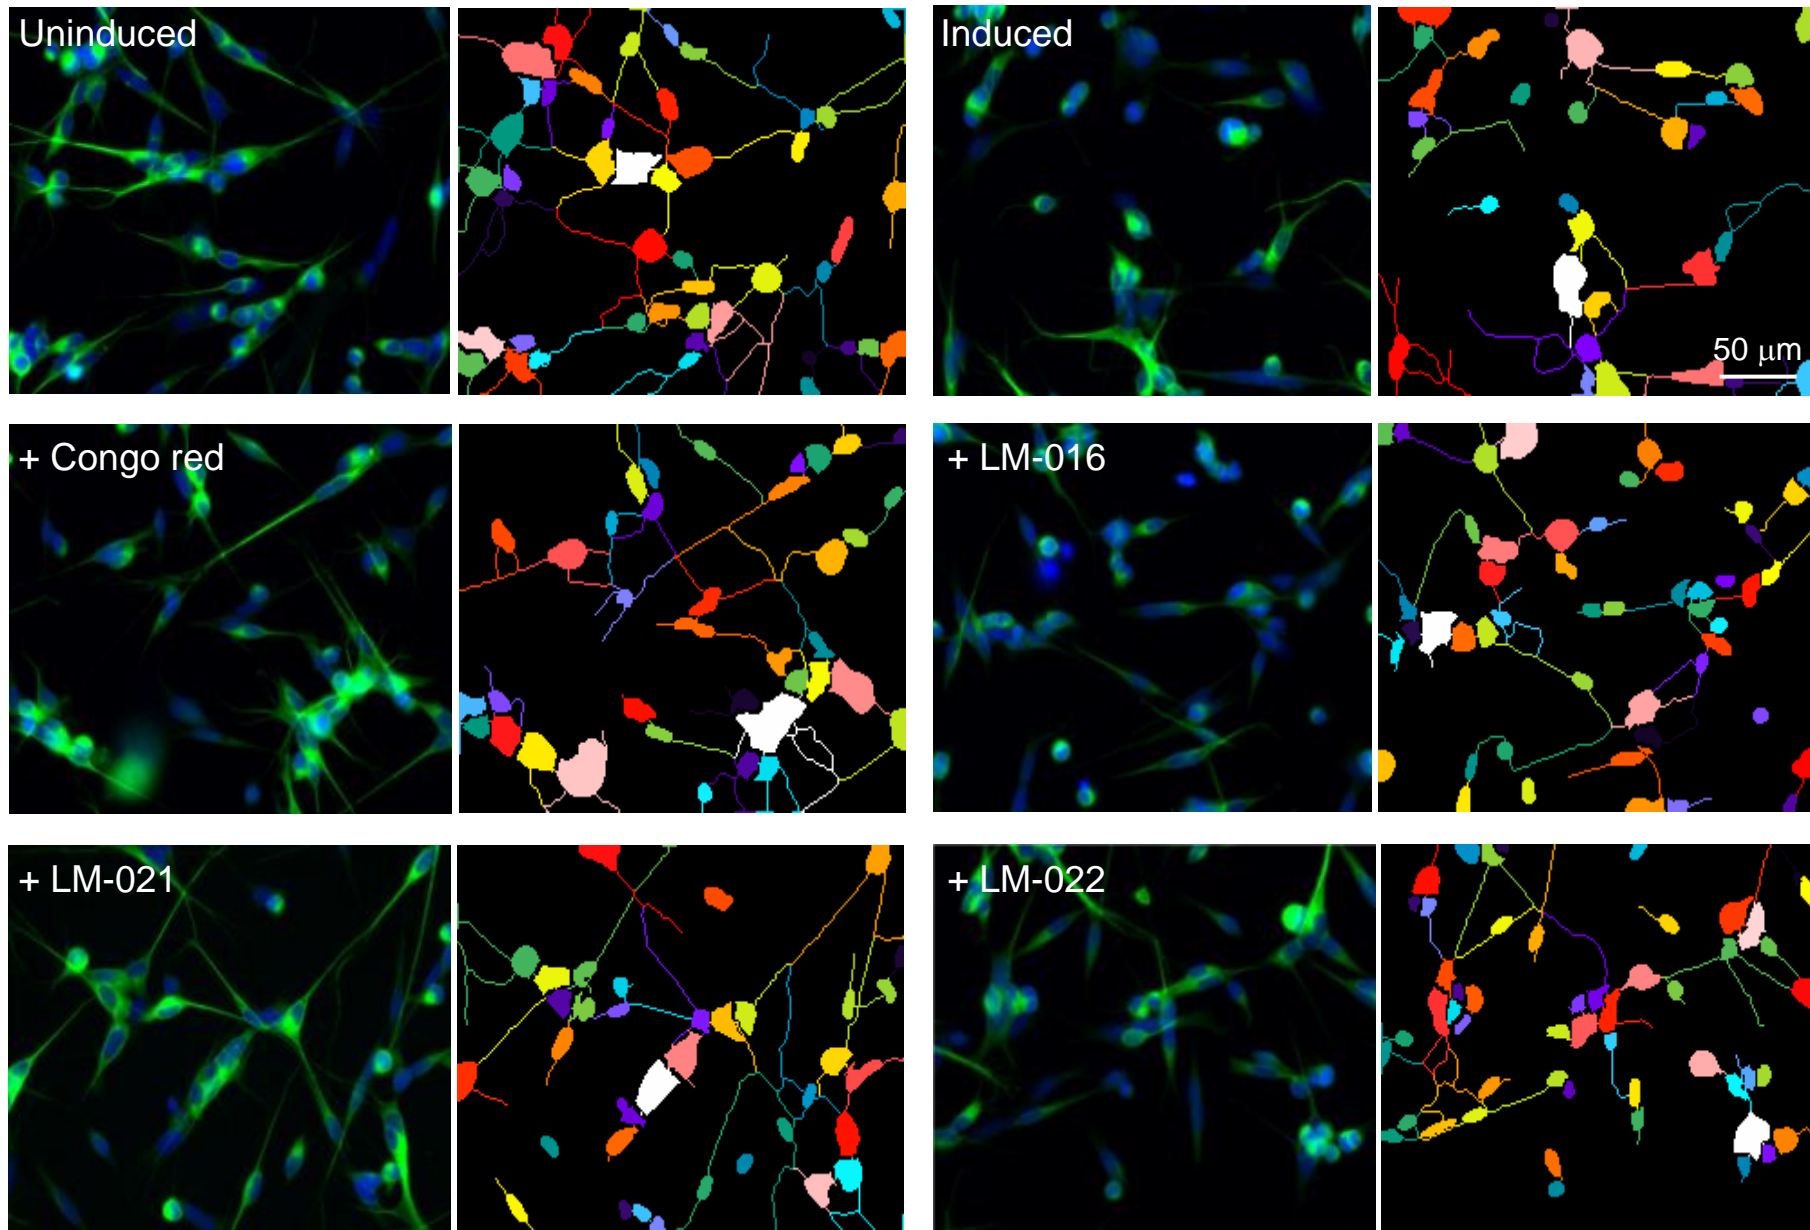

Supplement: f1 [file 3058861.f1.zip]

A

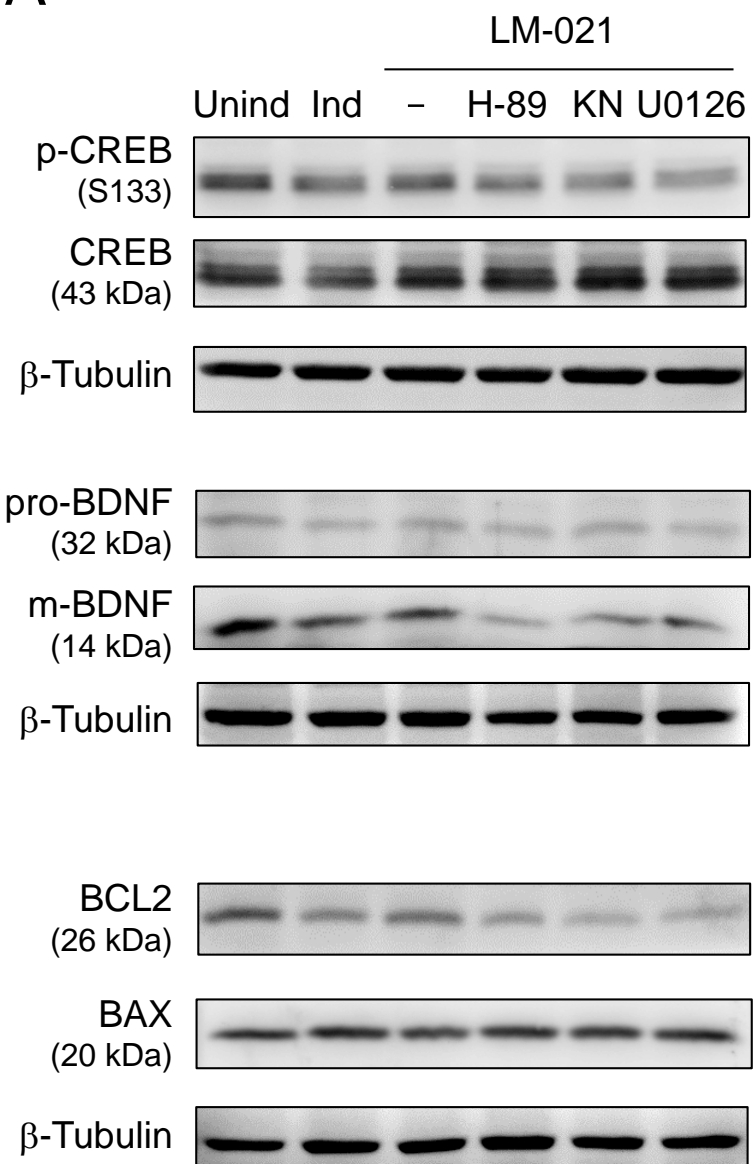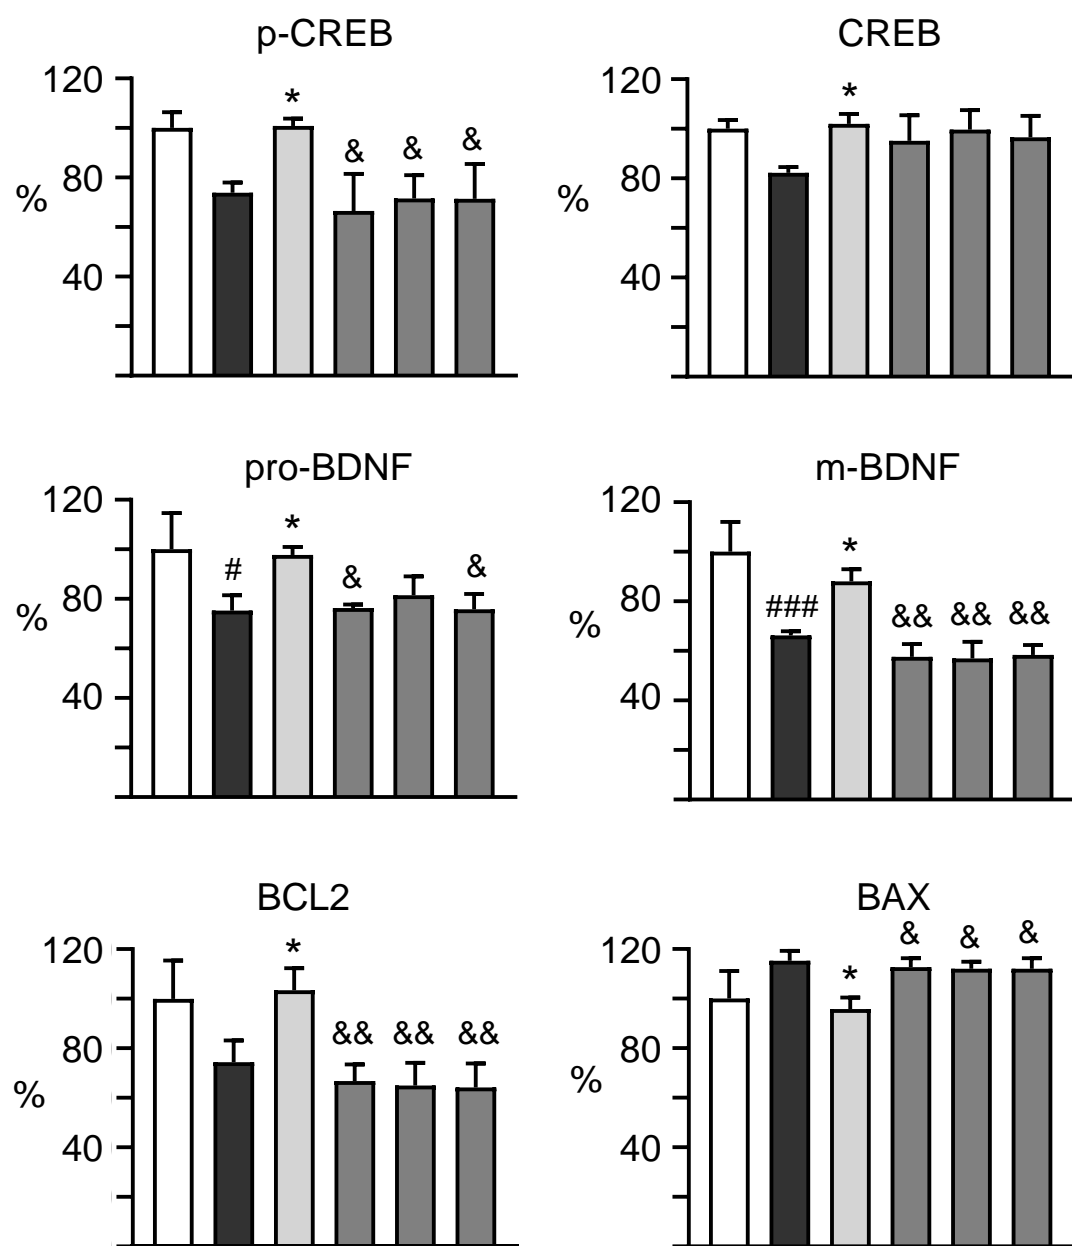

B

TUBB3/DAPI

Uninduced

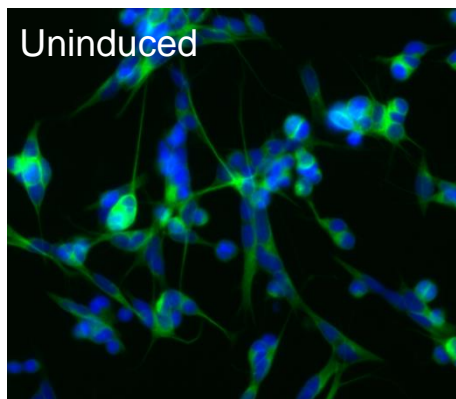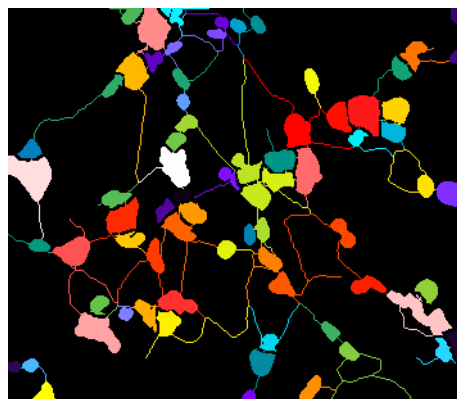

Induced

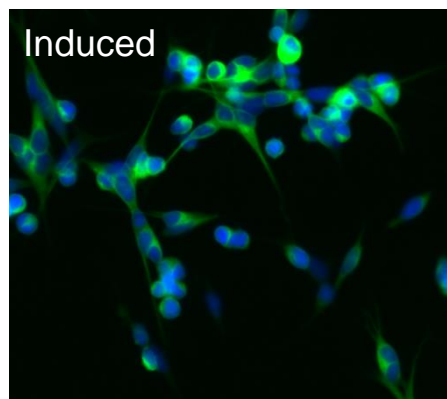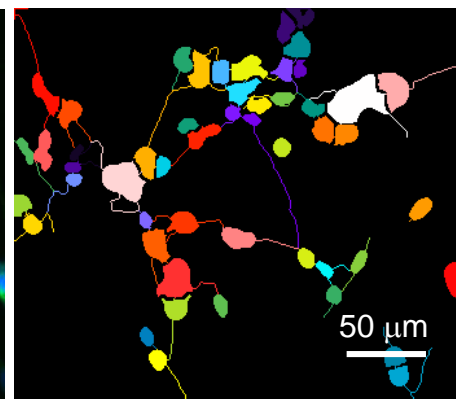

+ LM-021

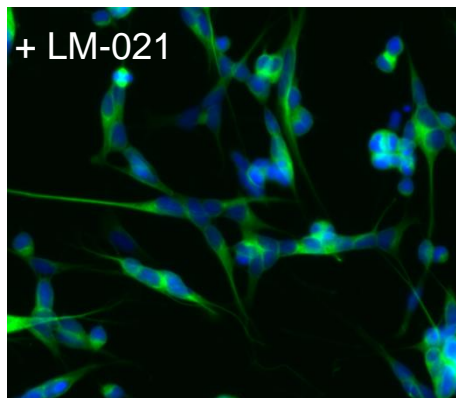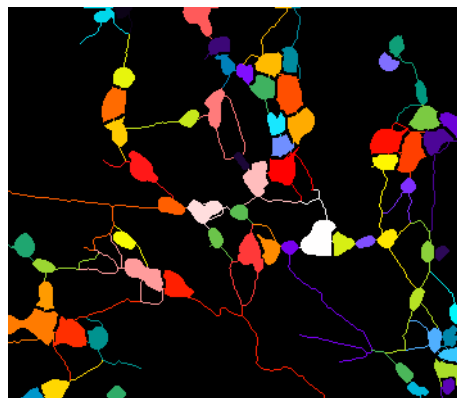

+ LM-021/H-89

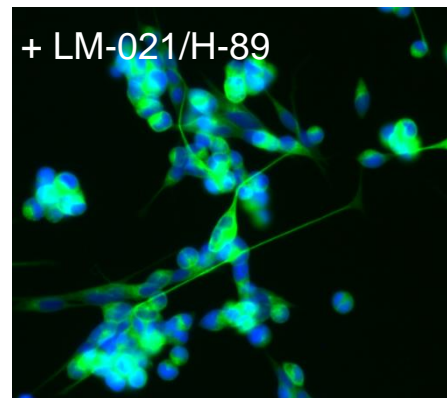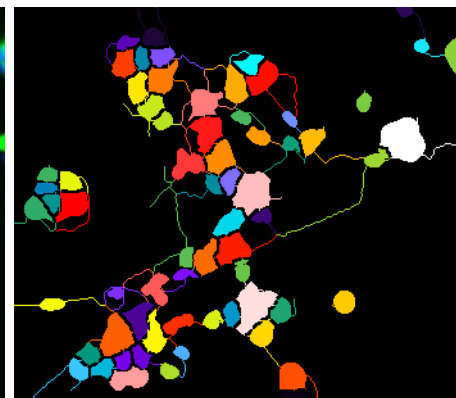

+ LM-021/KN-62

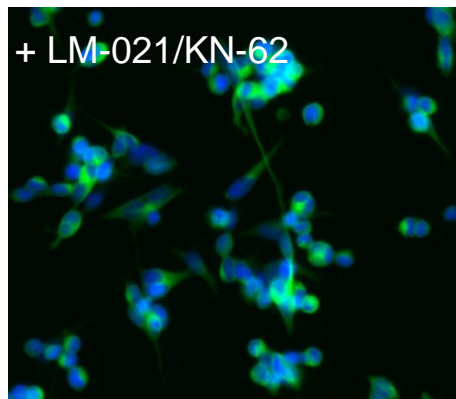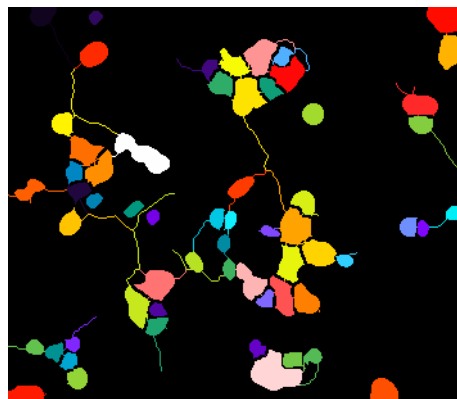

+ LM-021/U0126

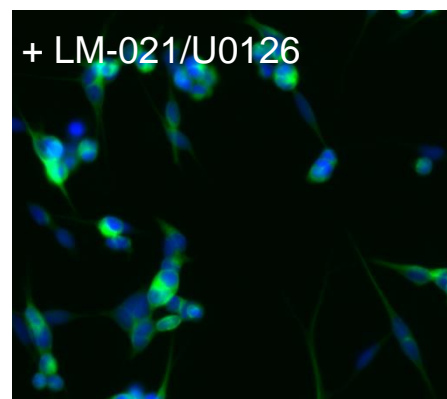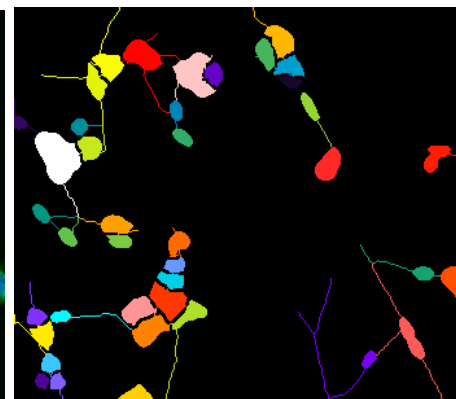

Supplement: f1 [file 3058861.f1.zip]

A

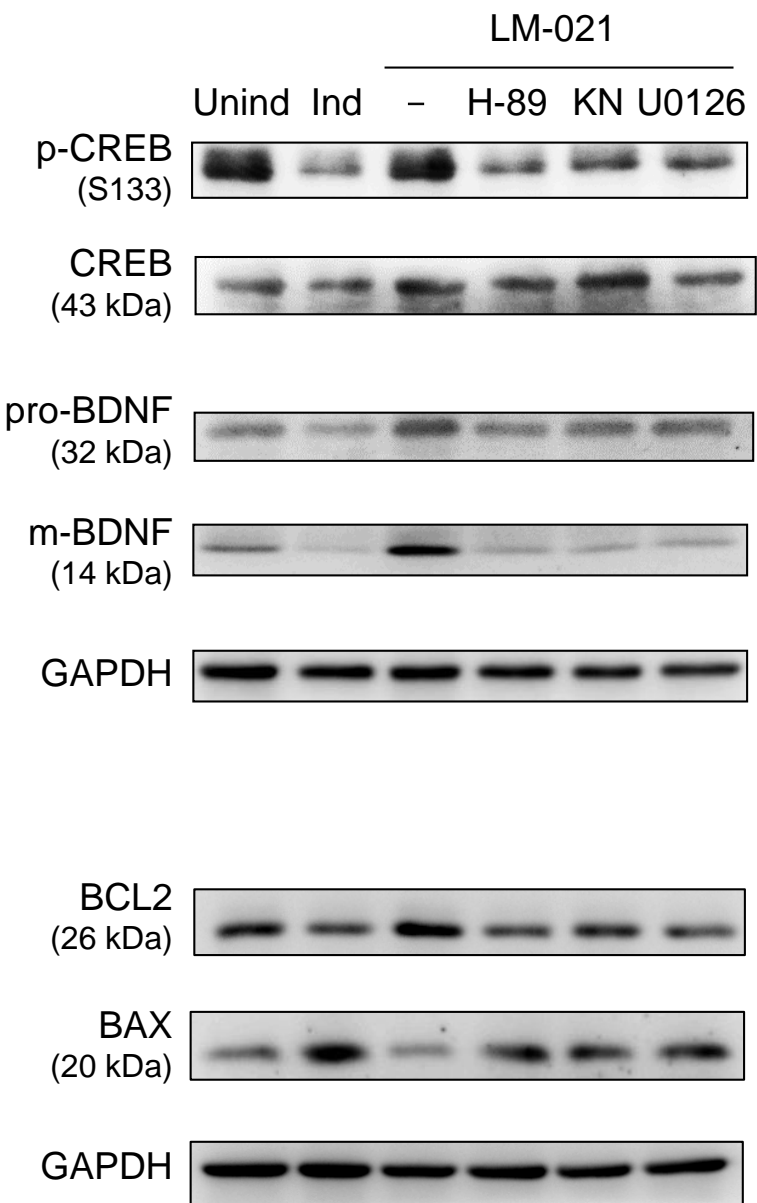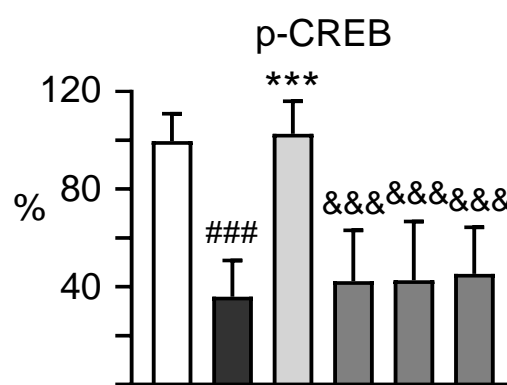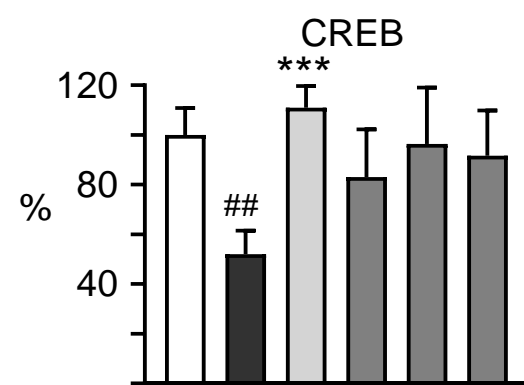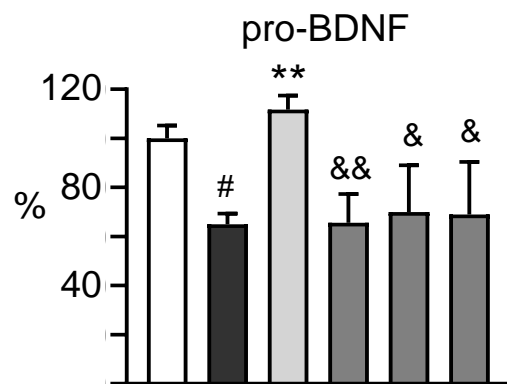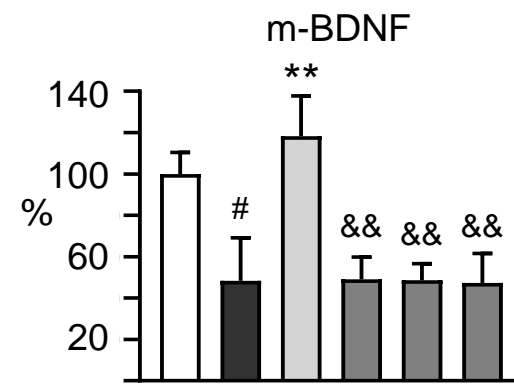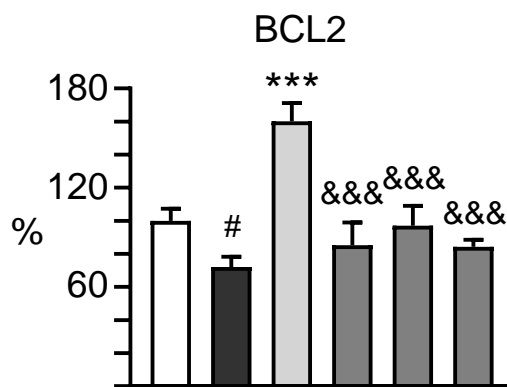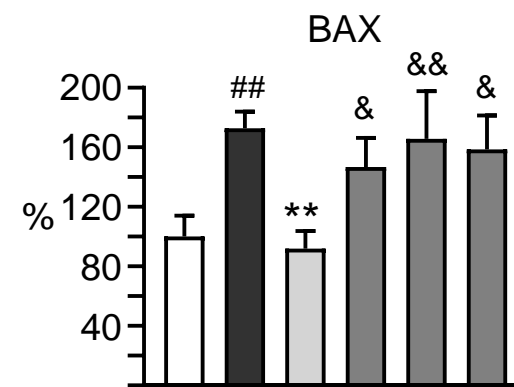

**B****TUBB3/DAPI**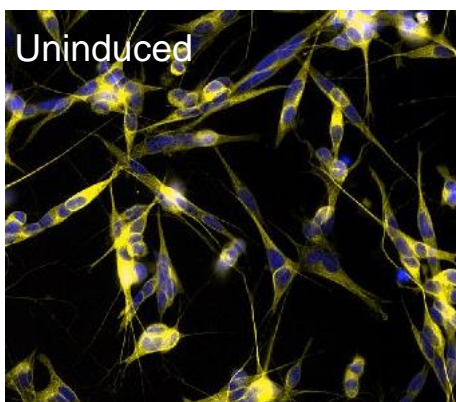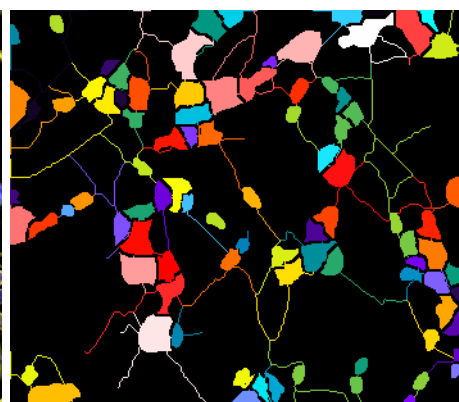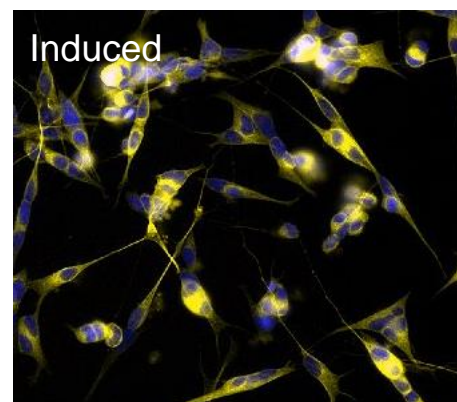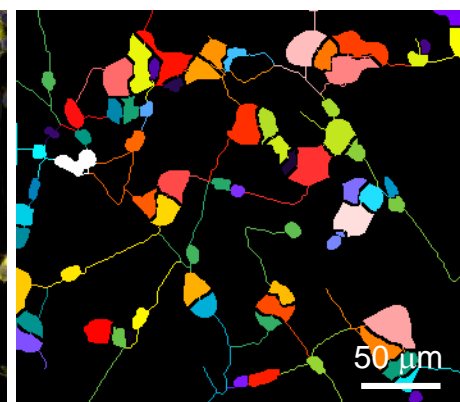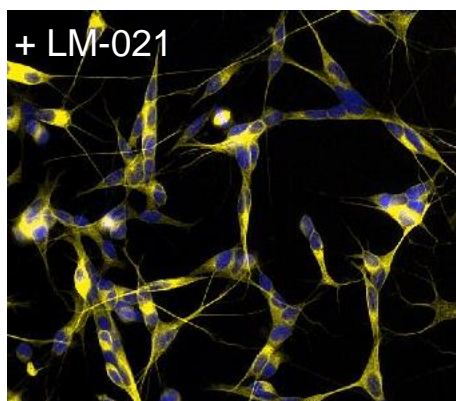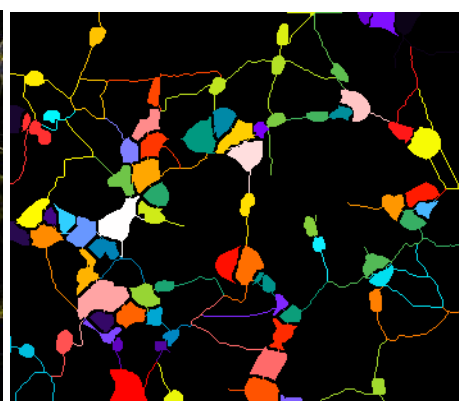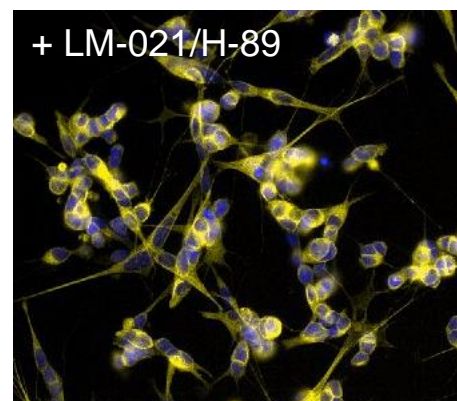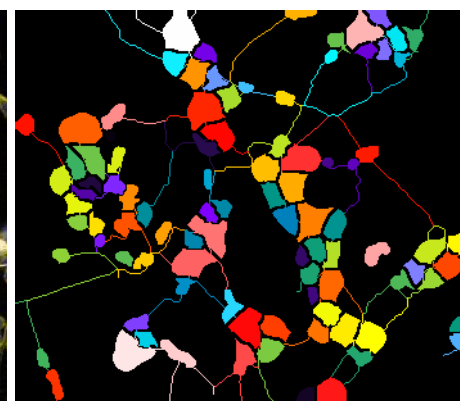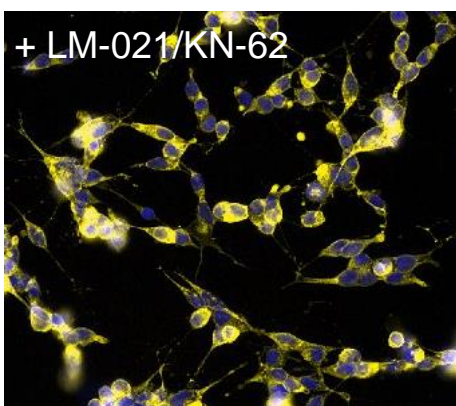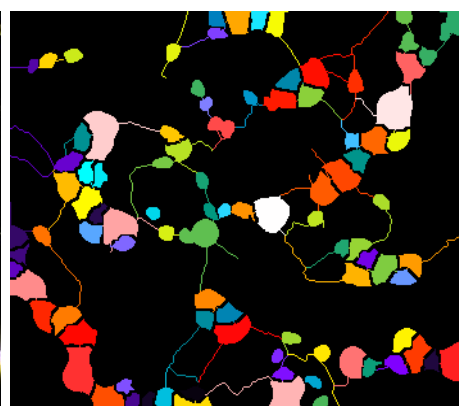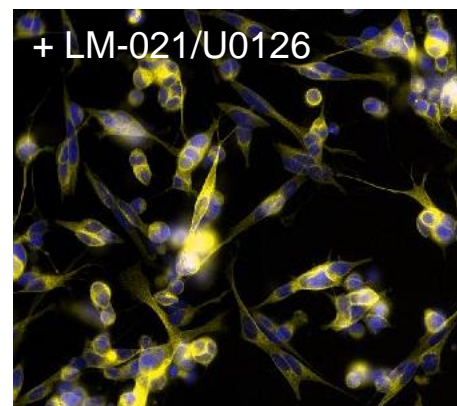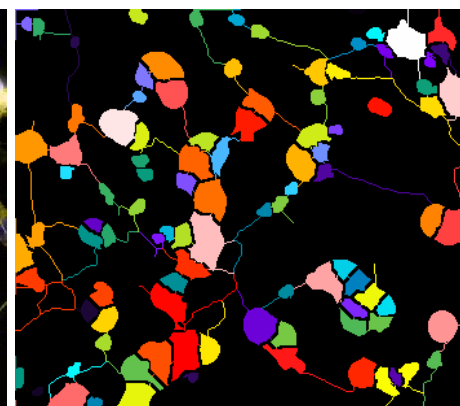

Supplement: f1 [file 3058861.f1.zip]
